# Supplementary material for: Sample size calculations based on a difference in medians for positively skewed outcomes in health care studies
Source: BMC Med Res Methodol. 2017 Dec 2;17:157. doi: 10.1186/s12874-017-0426-1 (PMC5712177; doi:10.1186/s12874-017-0426-1)
Supplement: Additional file 1 — Properties of the log-normal distribution, derivation of the variance of the log-Exponential distribution and simulation study R code. Derivation of the relationship between the median of a log-normal random variable and the mean of its log-transform. Derivation of the form of the variance of the log-transformed outcome and that for the log-exponential distribution. R code for the simulation studies presented in this paper. (PDF 164 kb) [file 12874_2017_426_MOESM1_ESM.pdf]

# Additional File 1: Properties of the log-normal distribution, derivation of the variance of the log-Exponential distribution and simulation study R code

Aidan G. O’Keeffe\*, Gareth Ambler, and Julie A. Barber

*Department of Statistical Science, University College London, WC1E 6BT,  
UK*

## Relationship between the median of a log-normal random variable and the mean of its log-transform

Let

$$T_{ij} \sim \log\mathcal{N}(\mu_j, \sigma_j^2).$$

Defining  $m_j$  as the median of the probability distribution of  $T_{ij}$ ,  $m_j$  is the value such that

$$\mathbb{P}(T_{ij} \leq m_j) = \frac{1}{2}.$$

Since the natural logarithm is a monotonic increasing function of  $T_{ij}$ , it follows that

$$\mathbb{P}(\log(T_{ij}) \leq \log(m_j)) = \frac{1}{2}$$

Recalling that  $\log(T_{ij}) \sim \mathcal{N}(\mu_j, \sigma_j^2)$ , then

$$Z_{ij} = \frac{\log(T_{ij}) - \mu_j}{\sigma_j} \sim \mathcal{N}(0, 1).$$

---

\*E-mail address: [a.o'keeffe@ucl.ac.uk](mailto:a.o'keeffe@ucl.ac.uk); Corresponding author

Thus,

$$\begin{aligned} & \mathbb{P}(\log(T_{ij}) \leq \log(m_j)) = \frac{1}{2}; \\ \implies & \mathbb{P}\left(\frac{\log(T_{ij}) - \mu_j}{\sigma_j} \leq \frac{\log(m_j) - \mu_j}{\sigma_j}\right) = \frac{1}{2}; \\ \implies & \mathbb{P}\left(Z_{ij} \leq \frac{\log(m_j) - \mu_j}{\sigma_j}\right) = \frac{1}{2}. \end{aligned}$$

Hence,

$$\frac{\log(m_j) - \mu_j}{\sigma_j} = \Phi^{-1}\left(\frac{1}{2}\right) = 0$$

where  $\Phi^{-1}()$  denotes the inverse cumulative density function of a standard  $\mathcal{N}(0, 1)$  random variable. As a result

$$\begin{aligned} & \log(m_j) - \mu_j = 0 \\ \implies & m_j = \exp(\mu_j), \text{ as required.} \end{aligned}$$

## Derivation of variance of log-transformed outcome

Let

$$T_{ij} \sim \log\mathcal{N}(\mu_j, \sigma_j^2).$$

Then

$$\text{Var}(T_{ij}) = (\exp(\sigma_j^2) - 1) \exp(2\mu_j + \sigma_j^2) = \phi_j^2.$$

It follows that

$$\begin{aligned}
& (\exp(\sigma_j^2) - 1) \exp(\sigma_j^2) \exp(2\mu_j) = \phi_j^2 \\
& \exp(2\mu_j) \exp(2\sigma_j^2) - \exp(2\mu_j) \exp(\sigma_j^2) - \phi_j^2 = 0 \\
& \exp(2\sigma_j^2) - \exp(\sigma_j^2) - \frac{\phi_j^2}{\exp(2\mu_j)} = 0 \\
& \left( \exp(\sigma_j^2) - \frac{1}{2} \right)^2 - \frac{1}{4} - \frac{\phi_j^2}{\exp(2\mu_j)} = 0 \\
& \left( \exp(\sigma_j^2) - \frac{1}{2} \right)^2 = \frac{1}{4} + \frac{\phi_j^2}{\exp(2\mu_j)} \\
& \exp(\sigma_j^2) - \frac{1}{2} = \sqrt{\frac{1}{4} + \frac{\phi_j^2}{\exp(2\mu_j)}} \\
& \exp(\sigma_j^2) = \frac{1}{2} + \sqrt{\frac{1}{4} + \frac{\phi_j^2}{\exp(2\mu_j)}} \\
& \sigma_j^2 = \log \left[ \frac{1}{2} + \sqrt{\frac{1}{4} + \frac{\phi_j^2}{\exp(2\mu_j)}} \right] \text{ as required.}
\end{aligned}$$

## Derivation of Variance of Logarithm of an Exponential Random Variable

Let  $X \sim \text{Exp}(\lambda)$ , then

$$f_X(x; \lambda) = \lambda \exp(-\lambda x) \quad (x > 0)$$

Consider  $\mathbb{E}(\log(X))$  :

$$\begin{aligned}
\mathbb{E}(\log(X)) &= \int_0^\infty \log(x) \lambda \exp(-\lambda x) dx \\
&= \int_0^\infty [\log(y) - \log(\lambda)] \exp(-y) dy \quad (\text{using the substitution } y = \lambda x) \\
&= \gamma - \log(\lambda)
\end{aligned}$$

where  $\gamma$  is the Euler-Mascheroni constant

$$\gamma = \int_0^{\infty} \log(y) \exp(-y) dy.$$

The variance of  $\log(X)$  is given by

$$\text{Var}(\log(X)) = \mathbb{E}[(\log(X))^2] - \mathbb{E}(\log(X))^2 \quad (1)$$

Consider  $\mathbb{E}[(\log(X))^2]$ :

$$\begin{aligned} \mathbb{E}[(\log(X))^2] &= \int_0^{\infty} (\log(x))^2 \lambda \exp(-\lambda x) dx \\ &= \int_0^{\infty} (\log(y) - \log(\lambda))^2 e^{-y} dy \\ &= \int_0^{\infty} (\log(y))^2 e^{-y} dy - 2\log(\lambda) \int_0^{\infty} \log(y) e^{-y} dy + (\log(\lambda))^2 \int_0^{\infty} e^{-y} dy \\ &= \frac{\pi^2}{6} + \gamma^2 - 2[\gamma - \log(\lambda)] + (\log(\lambda))^2 \\ &= \frac{\pi^2}{6} + (\log(\lambda) - \gamma)^2 \end{aligned}$$

and substitution of the above into (1) yields

$$\begin{aligned} \text{Var}(\log(X)) &= \frac{\pi^2}{6} + (\log(\lambda) - \gamma)^2 - (\gamma - \log(\lambda))^2 \\ &= \frac{\pi^2}{6} \text{ as required.} \end{aligned}$$

## R Code for the Simulation Study Presented in Table 1

The function ‘`logn_sim_study`’ simulates datasets of a pre-specified size ( $n$ ) drawn from log-normal distributions with pre-specified medians  $m_1$ ,  $m_2$  and standard deviations  $\phi_1$  and  $\phi_2$  for groups 1 and 2. Simulated data for the groups are then compared using: (1) a two-sample t-test on log-transformed outcomes, (2) A Mann-Whitney U test on untransformed outcomes, (3) A two-sample t-test on untransformed outcomes. This code is repeated 100000 times, for each scenario, for the simulation study presented in Table 1 of the paper.

```
#Argument ‘pars’ is a 5x1 vector of parameters where
#pars[1] = Pre-specified median for group 1
```

```

#pars[2] = Pre-specified median for group 2
#pars[3] = Pre-specified standard deviation (untransformed) for group 1
#pars[4] = Pre-specified standard deviation (untransformed) for group 2
#pars[5] = n = Analytical sample size (calculated using Equation (4) from the paper).

logn_sim_study<-function(pars){
  median1<-pars[1]
  median2<-pars[2]
  phi1<-pars[3]
  phi2<-pars[4]
  n<-pars[5]

  #Recover log-scale means using the pre-specified medians
  mu1<-log(median1)
  mu2<-log(median2)

  #Recover standard deviations on the log-scale using the pre-specified medians,
  #untransformed variances and the Equation (2) from the paper.
  sigma1<-sqrt(log(1/2+sqrt(1/4+((phi1^2)/(median1^2)))))
  sigma2<-sqrt(log(1/2+sqrt(1/4+((phi2^2)/(median2^2)))))

  #Simulate n values from log-normal distributions for each of groups 1 and 2.
  #For group 1: log-scale mean = mu1, standard deviation of
  #log-transformed outcomes = sigma1;
  #For group 2: log-scale mean = mu2, standard deviation of
  #log-transformed outcomes = sigma2.

  y1<-rlnorm(n,meanlog=mu1,sdlog=sigma1)
  y2<-rlnorm(n,meanlog=mu2,sdlog=sigma2)

  #Perform a two-sample t-test on log-transformed outcomes.
  log_ttest<-t.test(log(y1),log(y2),var.equal=TRUE)

  #Extract the P-value from the two-sample t-test on log-transformed outcomes.
  logn_pval<-log_ttest$p.value

```

```

#Create a binary variable that equals 1 if the null hypothesis is rejected
#and 0 otherwise.
logn_reject<-ifelse(logn_pval<0.05,1,0)

#Perform a Mann-Whitney U test on untransformed outcomes.
mw_test<-wilcox.test(y1,y2,alternative="two.sided")

#Extract the P-value from the Mann-Whitney U test on untransformed outcomes.
mw_pval<-mw_test$p.value

#Create a binary variable that equals 1 if the null hypothesis is rejected
#and 0 otherwise.
mw_reject<-ifelse(mw_pval<0.05,1,0)

#Perform a two-sample t-test on untransformed outcomes.
ttest<-t.test(y1,y2,var.equal=TRUE)

#Extract the P-value from the two-sample t-test on log-transformed outcomes.
t_pval<-ttest$p.value

#Create a binary variable that equals 1 if the null hypothesis is rejected
#and 0 otherwise.
t_reject<-ifelse(t_pval<0.05,1,0)

#Produce a table of results and output this.
results<-data.frame(logn_pval,logn_reject,mw_pval,mw_reject,t_pval,t_reject)
names(results)<-c("log_N_P_Value","log_N_Reject","MW_P_Value","MW_Reject",
                 "t_test_P_Value","t_test_Reject")
return(results)
}

```

## R Code for the Simulation Studies Presented in Tables 2 and 3

The function ‘exponential\_sim\_study’ simulates datasets of a pre-specified size ( $n$ ) drawn from Exponential distributions with pre-specified rates  $\lambda_1 = \log(2)/m_1$ ,  $\lambda_2 = \log(2)/m_2$  for groups 1 and 2 respectively. Simulated data for the groups are then compared using: (1) a two-sample t-test on log-transformed outcomes, (2) A Mann-Whitney U test on untransformed outcomes, (3) A two-sample t-test on untransformed outcomes. This code is repeated 100000 times, for each senario, for the simulation study presented in Tables 2 and 3 of the paper.

```
#Argument ‘pars’ is a 3x1 vector of parameters where
#pars[1] = Pre-specified median for group 1
#pars[2] = Pre-specified median for group 2
#pars[3] = n = Analytical sample size (calculated using Equation (4) from
#the paper for simulation study in Table 2, calculated using Equation (5)
#from the paper for simulation study in Table 3).

exponential_sim_study<-function(pars){

  median1<-pars[1]
  median2<-pars[2]
  n<-pars[3]

  #Compute the rates ‘lambda1’ for group 1 and ‘lambda2’ for group 2.
  lambda1<-log(2)/median1
  lambda2<-log(2)/median2

  #Simulate n values from Exponential distributions for each of groups 1 and 2.
  #y1 = simulated values for group 1;
  #y2 = simualted values for group 2.

  y1<-rexp(n,rate=lambda1)
  y2<-rexp(n,rate=lambda2)

  #Take log-transforms of simulated outcomes for groups 1 and 2, denoting
```

```

#these 'logy1' and 'logy2' respectively.
logy1<-log(y1)
logy2<-log(y2)

#Perform a two-sample t-test on log-transformed outcomes.
log_ttest<-t.test(log(y1),log(y2),var.equal=TRUE)

#Extract the P-value from the two-sample t-test on log-transformed outcomes.
logn_pval<-log_ttest$p.value

#Create a binary variable that equals 1 if the null hypothesis is rejected
#and 0 otherwise.
logn_reject<-ifelse(logn_pval<0.05,1,0)

#Perform a Mann-Whitney U test on untransformed outcomes.
mw_test<-wilcox.test(y1,y2,alternative="two.sided")

#Extract the P-value from the Mann-Whitney U test on untransformed outcomes.
mw_pval<-mw_test$p.value

#Create a binary variable that equals 1 if the null hypothesis is rejected
#and 0 otherwise.
mw_reject<-ifelse(mw_pval<0.05,1,0)

#Perform a two-sample t-test on untransformed outcomes.
ttest<-t.test(y1,y2,var.equal=TRUE)

#Extract the P-value from the two-sample t-test on log-transformed outcomes.
t_pval<-ttest$p.value

#Create a binary variable that equals 1 if the null hypothesis is rejected
#and 0 otherwise.
t_reject<-ifelse(t_pval<0.05,1,0)

#Produce a table of results and output this.

```

```
results<-data.frame(logn_pval,logn_reject,mw_pval,mw_reject,t_pval,t_reject)
names(results)<-c("log_N_P_Value","log_N_Reject","MW_P_Value","MW_Reject",
                 "t_test_P_Value","t_test_Reject")
return(results)
}
```
